# Supplementary material for: HIV-infected macrophages and microglia that survive acute infection become viral reservoirs by a mechanism involving Bim
Source: PubMed Central journal article supplement (PMC5634422; doi:10.1038/s41598-017-12758-w), 2017-10-09

# HIV-infected macrophages and microglia that survive acute infection become viral reservoirs by a mechanism involving Bim

Castellano Paul, Prevedel Lisa., and Eliseo A. Eugenin

Bcl2

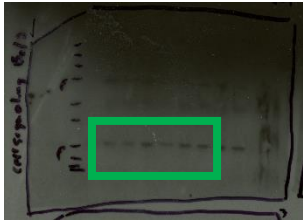

Bak

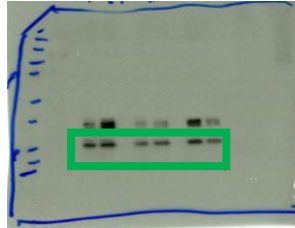

Bax

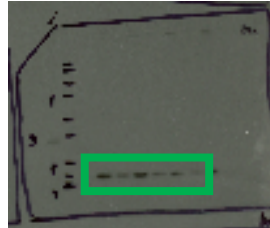

Bim

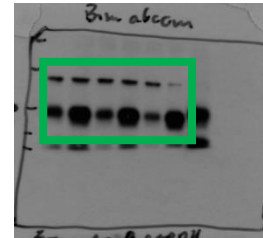

Apaf1

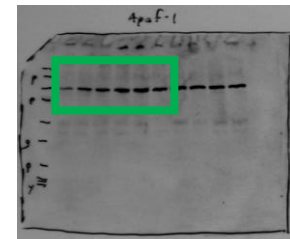

GAPDH

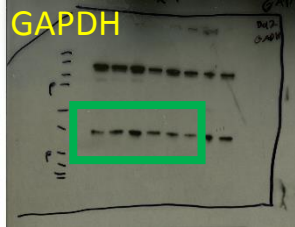

GAPDH

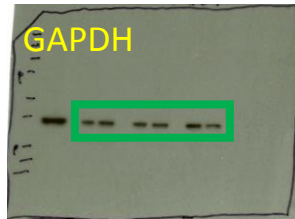

GAPDH

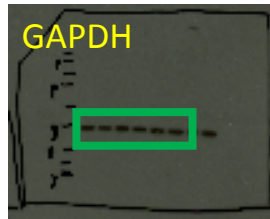

GAPDH

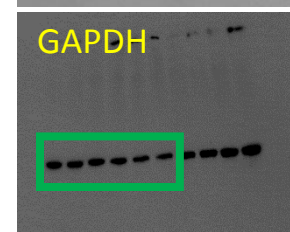

## Mitochondrial subcellular fractionations

CytC

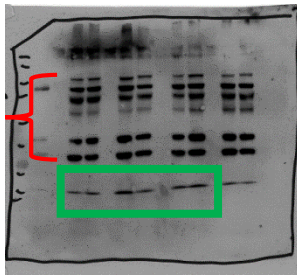

Casp3

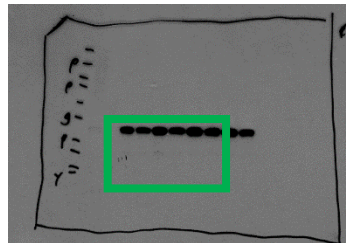

Bim

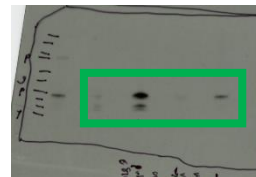

CytC

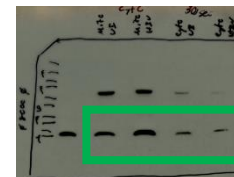

AIF

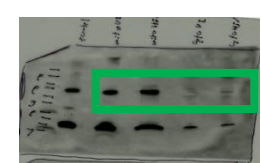

Bands from previous probes and inefficient stripping

Inefficient strip of Hsp70

GAPDH

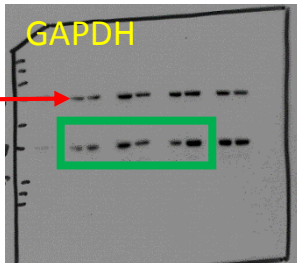

GAPDH

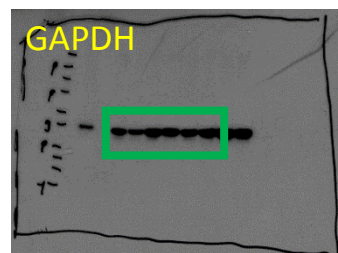

Tom20

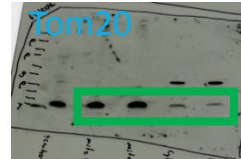

Tom20

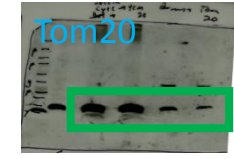

Tom20

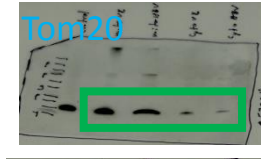

GAPDH

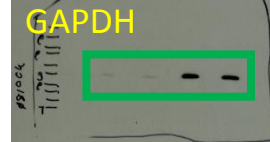

GAPDH

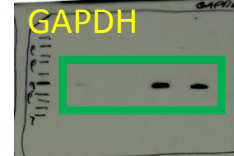

GAPDH

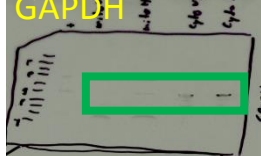

Supplement: 41598_2017_12758_MOESM1_ESM.pdf [file 41598_2017_12758_MOESM1_ESM.pdf]
